# Supplementary material
Source: MDPI journal article supplement (https://www.mdpi.com/1424-2818/15/11/1132)
Supplement: s1 [file s1]

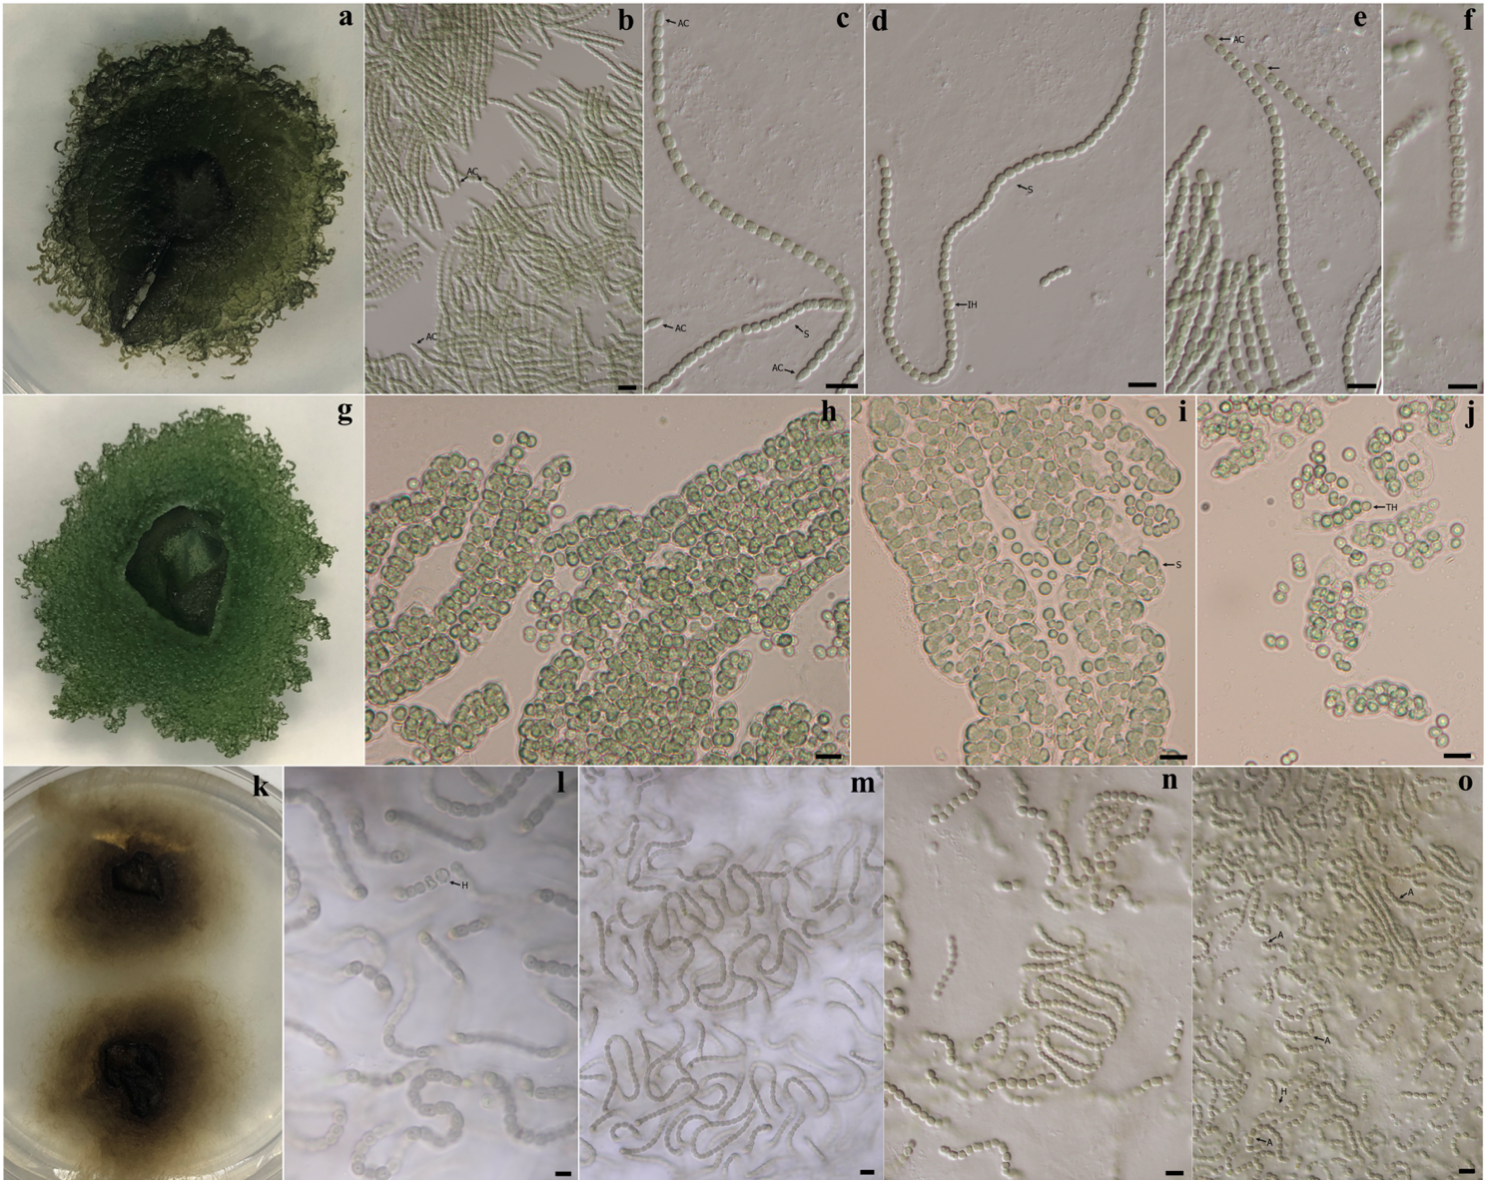

**Figure S1.** Macroscopic and microscopic characteristics of other strains of cyanobacteria investigated in this study. *Desmonostoc lechangense* CSM 014-B (a–f). (a) Blue-green colony on culture plate. (b–e) Filaments with narrow elongated apical cells (AC) enclosed by thick sheath (S). (e) Less granulated, colorless cells. *Desmonostoc aggregatum* CSM 022-B (g–j). (g) Bright-green colony on culture plate. (h) Aggregated cells in microcolony. (i,j) Vegetative cells mostly spherical with conical-rounded terminal heterocytes (TH). *Dendronalium* sp. CSM 025-N (k–o). (k) Brown colony on culture plate. (l–n) Bent and slightly twisted filaments with spherical to barrel-shaped vegetative cells. (o) Akinetes (A) produced in chain. Scale bar: 10 µm

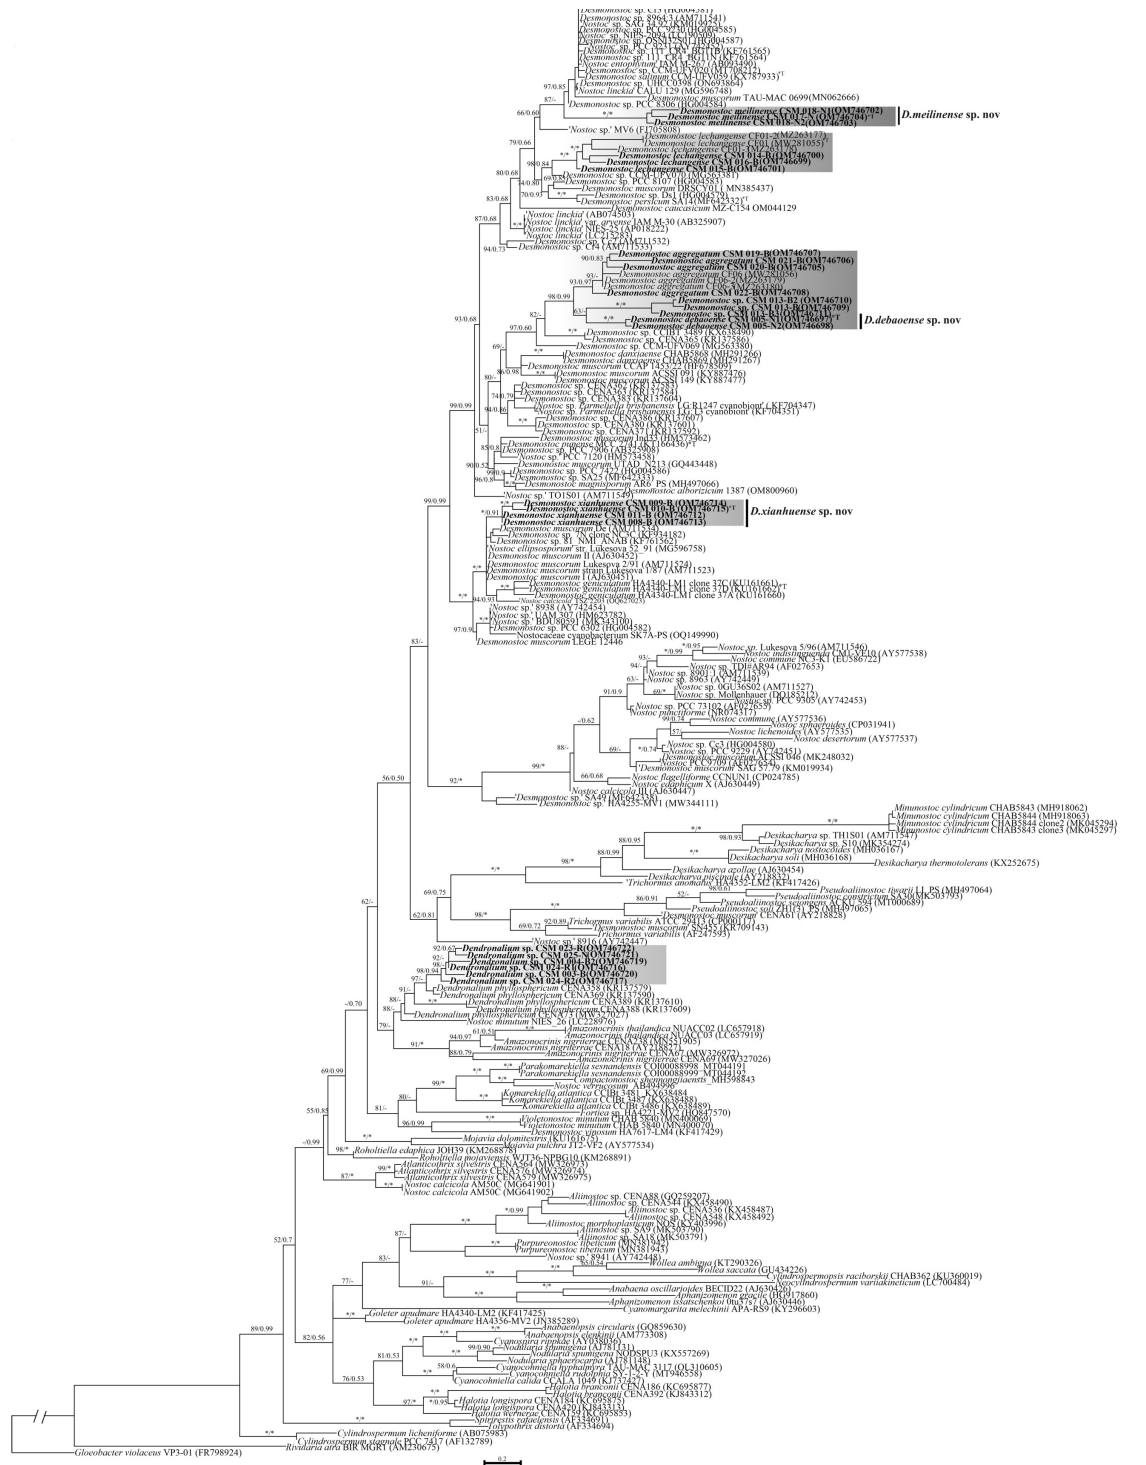

**Figure S2.** Uncollapsed Maximum Likelihood (ML) tree based on 16S rRNA gene sequences showing the phylogenetic positions of cyanobacterial strains under investigation and closely related taxa (224 16S rRNA gene sequences). Numbers on nodes indicate bootstrap values (>50%) and posterior(>0.50) probability obtained from ML and Bayesian analyses, respectively. An asterisk (\*) was used to denote bootstrap values of 100% for ML and posterior probabilities of 1.0 for Bayesian analysis, on the same node. The investigated are in bold font and highlighted in grey. The scale corresponds to substitutions/site.

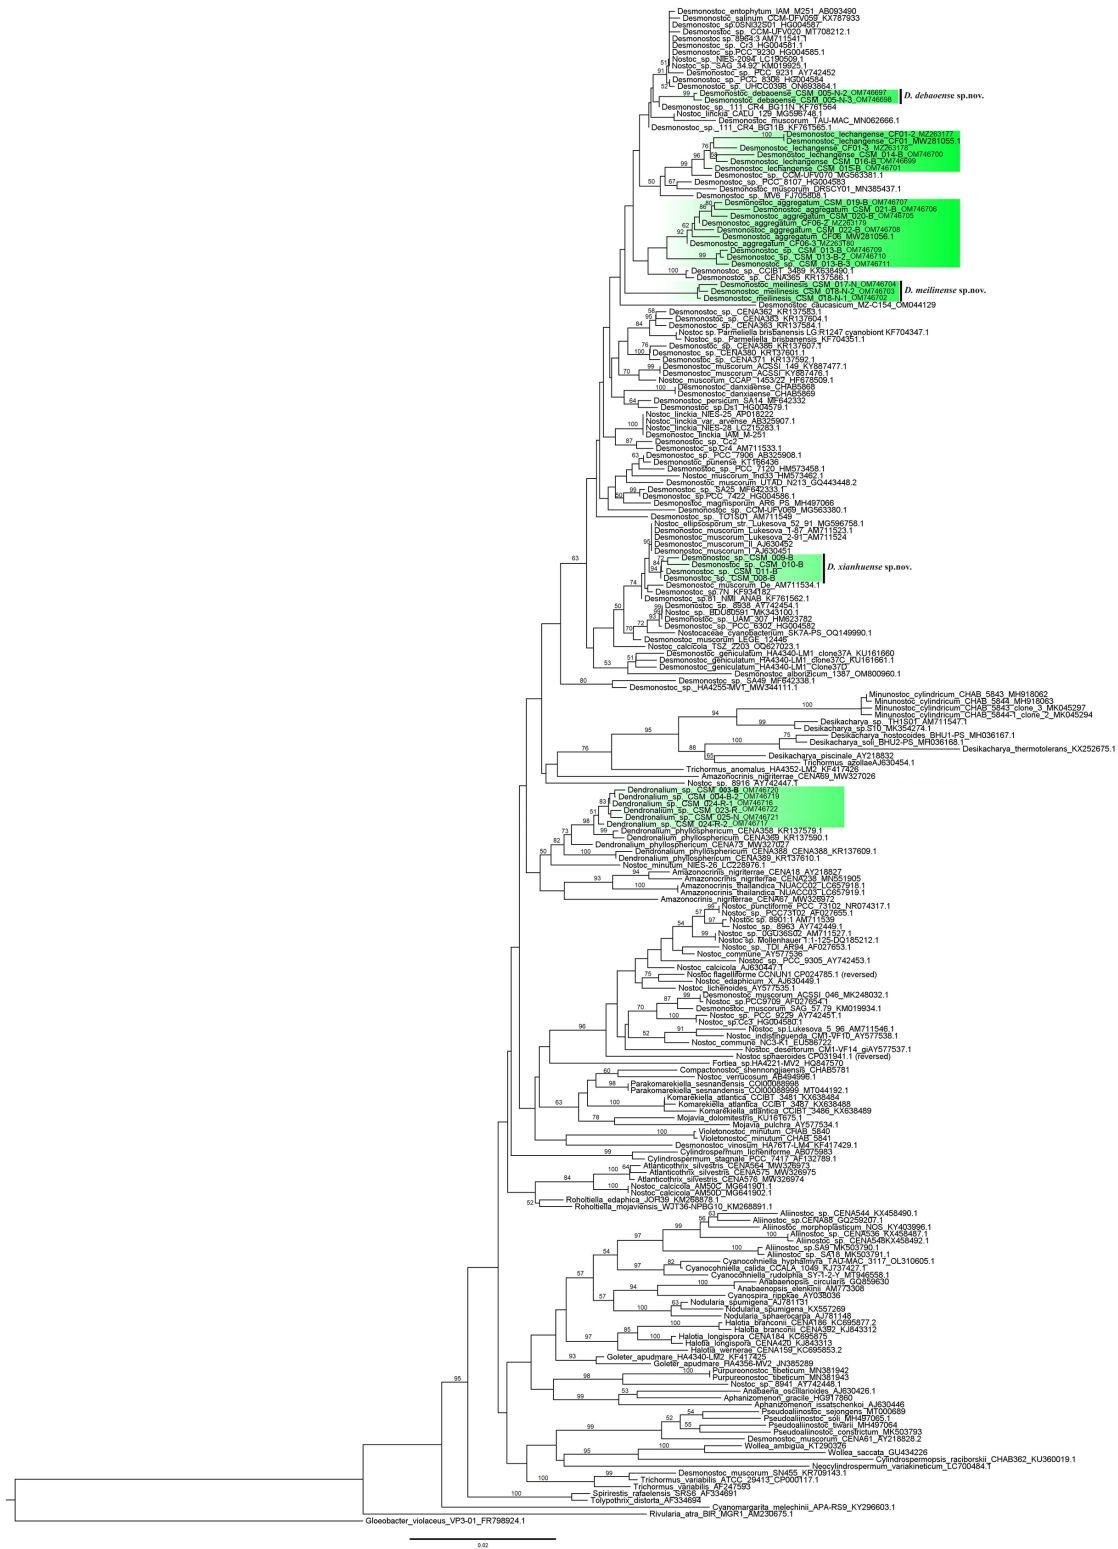

**Figure S3.** Neighbor-joining (NJ) tree based on 16S rRNA gene sequences showing the phylogenetic positions of the twenty cyanobacterial strains recovered from this study and other cyanobacterial taxa (224 16S rRNA gene sequences). Numbers at nodes indicate bootstrap values (>50%). The investigated strains in this study are highlighted and the novel species are marked with a star beside the name.

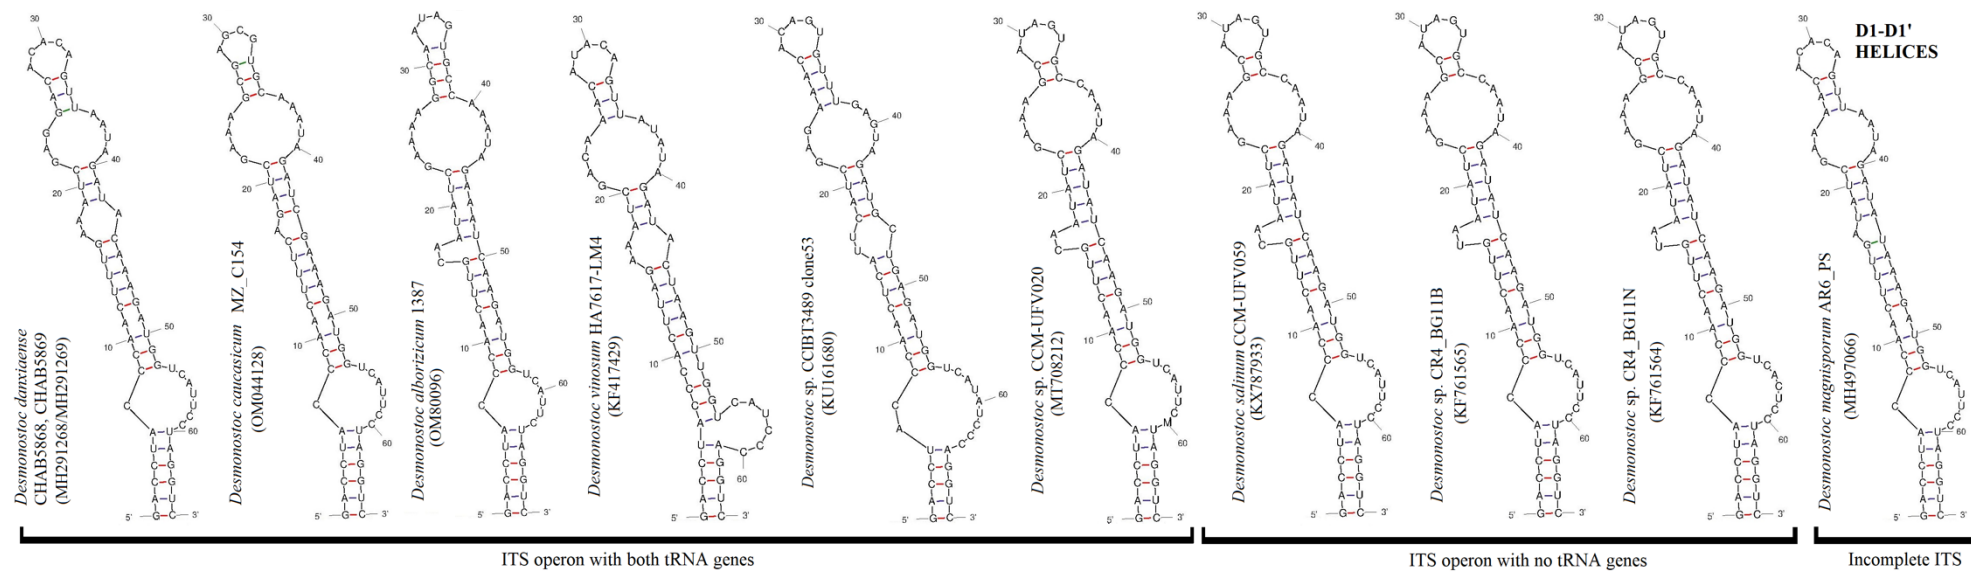

**Figure S4.** Predicted secondary structures of conserved D1-D1' helices of the 16S-23S ITS region among *Desmonostoc* strains.

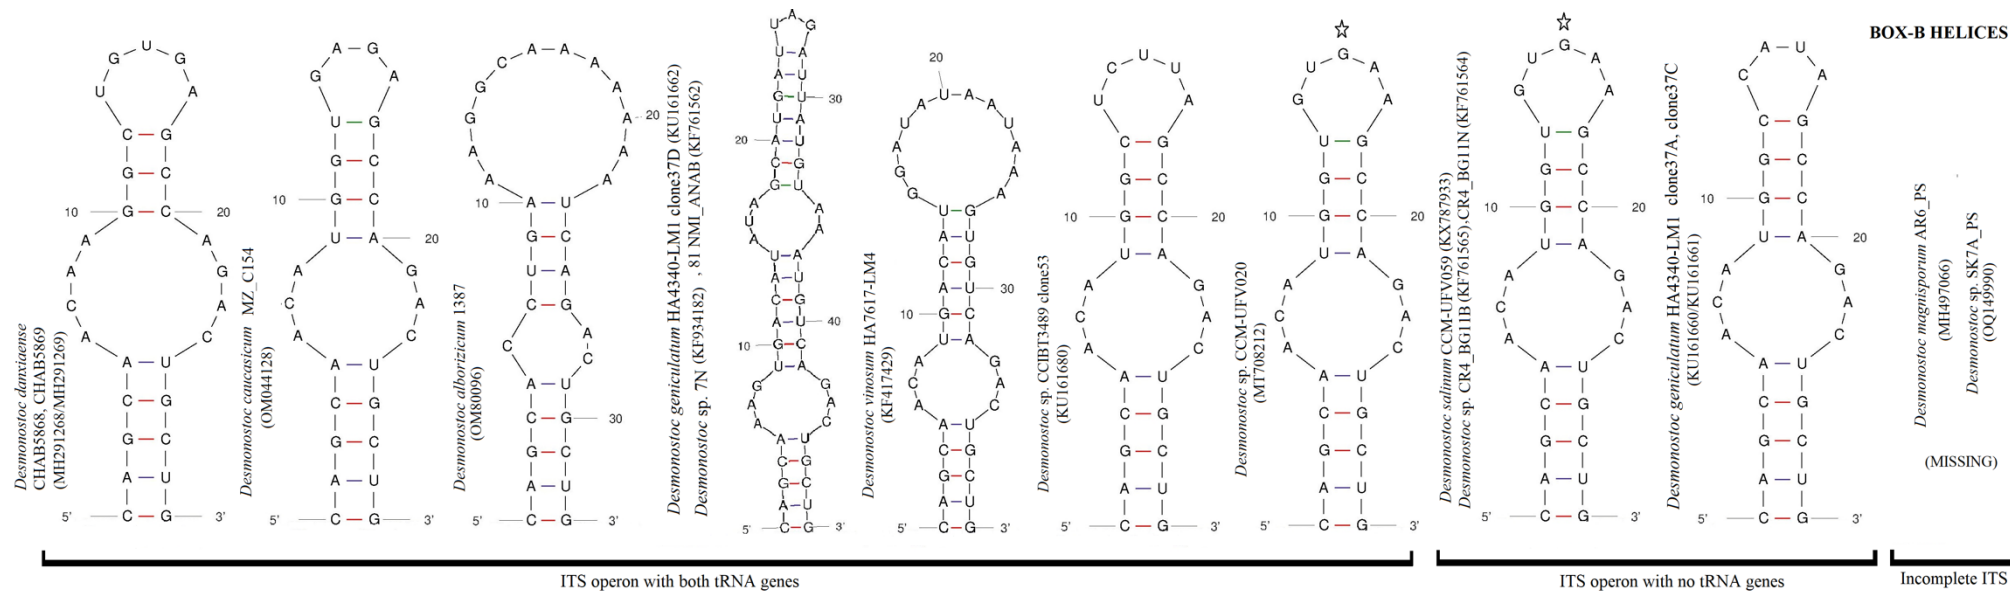

**Figure S5.** Predicted secondary structures of conserved Box-B helices of the 16S–23S ITS region among *Desmonostoc* strains. A star denotes identical in structure.

# V3 HELICES

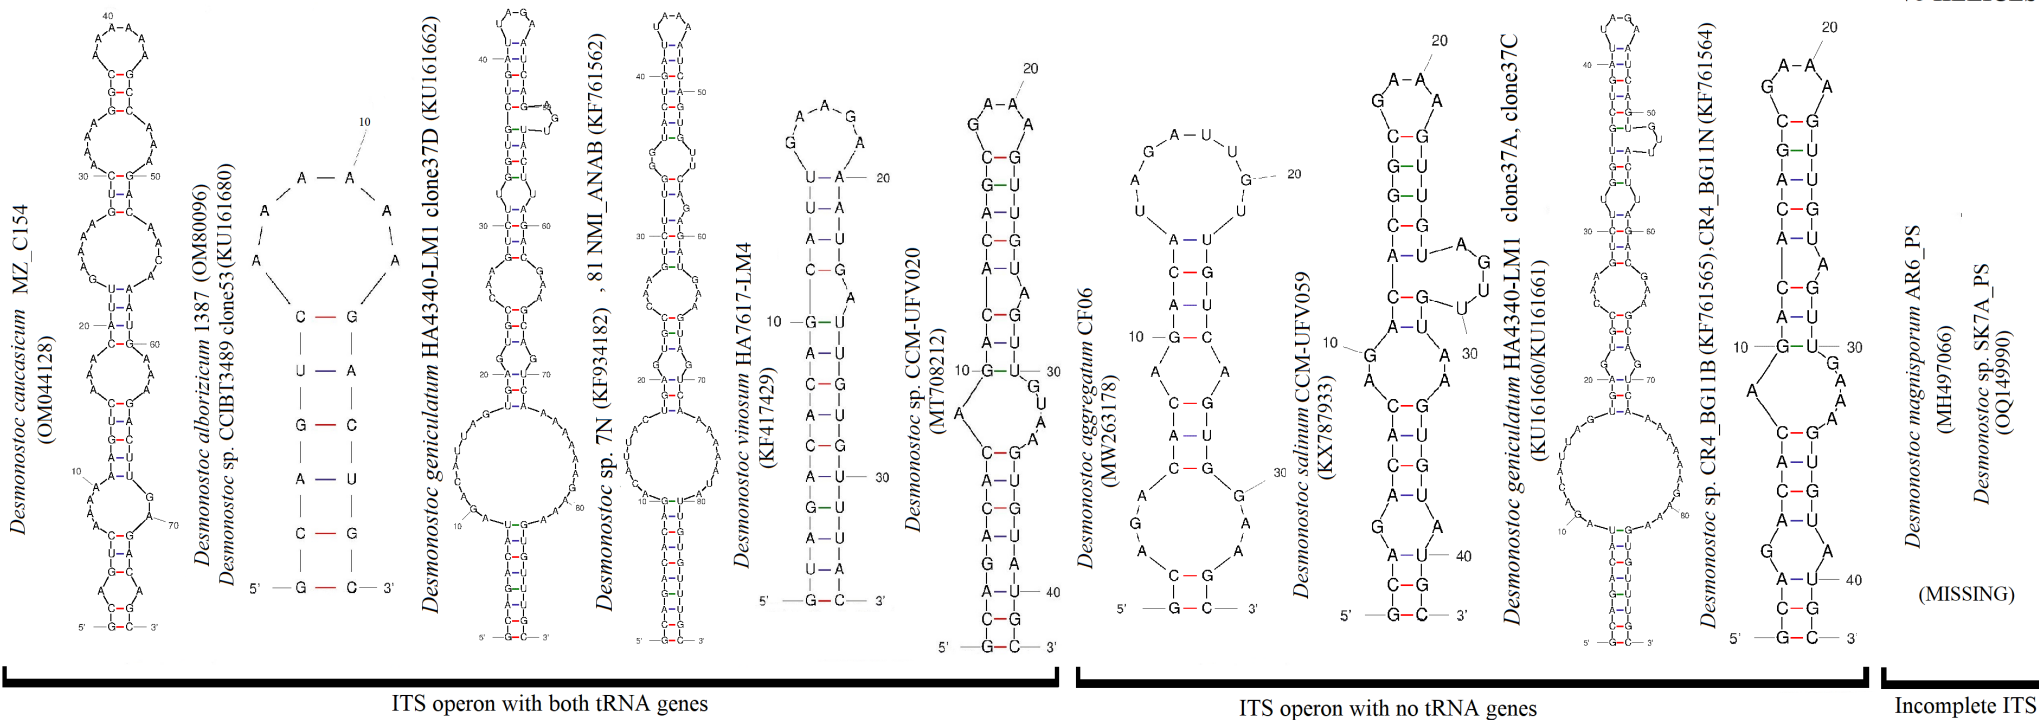

**Figure S6.** Predicted secondary structures of conserved V3 helices of the 16S–23S ITS region among *Desmonostoc* strains.

**Table S1.** List of the 20 cyanobacterial strains examined in this study.

| No | Strain    | Host                       | <sup>1</sup> Locality | Host habitat type   | GenBank<br>Accession<br>number (16S<br>rRNA gene) | Living<br>Collection Code |
|----|-----------|----------------------------|-----------------------|---------------------|---------------------------------------------------|---------------------------|
| 1  | CSM 005-N | <i>Cycas debaoensis</i>    | a                     | natural habitat     | OM746697,<br>OM746698                             | FLBG-CSM 005              |
| 2  | CSM 014-B | <i>Cycas elongata</i>      | d                     | botanic garden      | OM746700                                          | FLBG-CSM 014              |
| 3  | CSM016-B  | <i>Cycas fairylakea</i>    | d                     | botanic garden      | OM746699                                          | FLBG-CSM 016              |
| 4  | CSM015-B  | <i>Cycas fairylakea</i>    | d                     | botanic garden      | OM746701                                          | FLBG-CSM 015              |
| 5  | CSM 017-N | <i>Cycas fairylakea</i>    | c                     | natural habitat     | OM746704                                          | FLBG-CSM 017              |
| 6  | CSM 018-N | <i>Cycas fairylakea</i>    | c                     | natural habitat     | OM746702,<br>OM746703                             | FLBG-CSM 018              |
| 7  | CSM 019-B | <i>Cycas fairylakea</i>    | d                     | botanic garden      | OM746707                                          | FLBG-CSM 019              |
| 8  | CSM 020-B | <i>Cycas fairylakea</i>    | d                     | botanic garden      | OM746705                                          | FLBG-CSM 020              |
| 9  | CSM 021-B | <i>Cycas fairylakea</i>    | d                     | botanic garden      | OM746706                                          | FLBG-CSM 021              |
| 10 | CSM 022-B | <i>Ceratozamia robusta</i> | d                     | botanic garden      | OM746708                                          | FLBG-CSM 022              |
| 11 | CSM 013-B | <i>Macrozamia moorei</i>   | d                     | botanic garden      | OM746709,<br>OM746710,<br>OM746711                | FLBG-CSM 013              |
| 12 | CSM 011-B | <i>Cycas fairylakea</i>    | d                     | botanic garden      | OM746712                                          | FLBG-CSM 011              |
| 13 | CSM 008-B | <i>Cycas fairylakea</i>    | d                     | botanic garden      | OM746713                                          | FLBG-CSM 008              |
| 14 | CSM 009-B | <i>Ceratozamia robusta</i> | d                     | botanic garden      | OM746714                                          | FLBG-CSM 009              |
| 15 | CSM 010-B | <i>Ceratozamia robusta</i> | d                     | botanic garden      | OM746715                                          | FLBG-CSM 010              |
| 16 | CSM 003-B | <i>Cycas fairylakea</i>    | d                     | botanic garden      | OM746720                                          | FLBG-CSM 003              |
| 17 | CSM 004-B | <i>Cycas fairylakea</i>    | d                     | botanic garden      | OM746718,<br>OM746719                             | FLBG-CSM 004              |
| 18 | CSM 023-R | <i>Cycas debaoensis</i>    | b                     | reintroduction site | OM746722                                          | FLBG-CSM 023              |
| 19 | CSM 024-R | <i>Cycas debaoensis</i>    | b                     | reintroduction site | OM746716,<br>OM746717                             | FLBG-CSM 024              |
| 20 | CSM 025-N | <i>Cycas fairylakea</i>    | c                     | natural habitat     | OM746721                                          | FLBG-CSM 025              |

<sup>1</sup>Host locality/GPS coordinates: a= Debao County, Baise,Guangxi ; 23°29'29.2" N, 106°12'50.8" E

b= Huanglian mountain nature reserve, Debao County, Baise, Guangxi; 23°33'47.1" N, 106°14'09.8" E

c= Meilin Reservoir Park, Shenzhen, Guangdong; 22°34'38.5" N, 114°00'34.2" E

d= National Cycad Germplasm Conservation Center (NCGCC), Fairy Lake Botanical Garden (FLBG), Shenzhen, Guangdong; 22°34'36.4" N, 114°10'50.6" E

**Table S2.** Comparison of the 16S rRNA gene sequence similarity between *Desmonostoc* strains under investigation and closely related taxa. The intraspecies variation are highlighted in grey and similarity for the interspecies variation were averaged for species represented by multiple strains.

|                                              | 1    | 2    | 3    | 4    | 5    | 6    | 7    | 8    | 9    | 10   | 11   | 12   | 13   | 14   | 15   | 16   | 17   | 18   | 19   |
|----------------------------------------------|------|------|------|------|------|------|------|------|------|------|------|------|------|------|------|------|------|------|------|
| 1 <i>Desmonostoc debaoense</i>               |      |      |      |      |      |      |      |      |      |      |      |      |      |      |      |      |      |      |      |
| 2 <i>Desmonostoc meilinense</i>              | 97.3 | 99.4 |      |      |      |      |      |      |      |      |      |      |      |      |      |      |      |      |      |
| 3 <i>Desmonostoc xianhuense</i>              | 97.9 | 97.5 | 99.8 |      |      |      |      |      |      |      |      |      |      |      |      |      |      |      |      |
| 4 <i>Desmonostoc</i> sp. CSM 013-B           | 97.8 | 97.2 | 97.0 |      |      |      |      |      |      |      |      |      |      |      |      |      |      |      |      |
| 5 <i>Desmonostoc aggregatum</i>              | 97.9 | 97.2 | 97.2 | 97.7 | 99.0 |      |      |      |      |      |      |      |      |      |      |      |      |      |      |
| 6 <i>Desmonostoc lechangense</i>             | 97.3 | 97.7 | 96.4 | 96.8 | 96.9 | 98.9 |      |      |      |      |      |      |      |      |      |      |      |      |      |
| 7 <i>Desmonostoc danxiaense</i> CHAB5868     | 97.3 | 98.0 | 97.0 | 97.6 | 96.8 | 97.3 |      |      |      |      |      |      |      |      |      |      |      |      |      |
| 8 <i>Desmonostoc muscorum</i> Lukesova 1/87  | 97.5 | 96.8 | 99.6 | 96.8 | 96.9 | 96.2 | 97.6 |      |      |      |      |      |      |      |      |      |      |      |      |
| 9 <i>Desmonostoc alborizicum</i> 1387        | 96.4 | 96.6 | 96.2 | 96.0 | 95.8 | 95.8 | 96.8 | 96.5 |      |      |      |      |      |      |      |      |      |      |      |
| 10 <i>Desmonostoc geniculatum</i> HA4340-LM1 | 97.3 | 97.1 | 99.0 | 96.8 | 96.9 | 96.1 | 97.6 | 99.2 | 85.0 |      |      |      |      |      |      |      |      |      |      |
| 11 <i>Desmonostoc magnisporum</i> AR6_PS     | 97.5 | 97.8 | 97.3 | 98.0 | 97.4 | 97.4 | 98.5 | 97.9 | 95.1 | 95.5 |      |      |      |      |      |      |      |      |      |
| 12 <i>Desmonostoc persicum</i> SA14          | 97.4 | 97.3 | 97.0 | 97.7 | 97.3 | 97.7 | 98.6 | 97.5 | 94.2 | 94.8 | 98.2 |      |      |      |      |      |      |      |      |
| 13 <i>Desmonostoc punense</i> MCC 2741       | 97.4 | 97.6 | 97.8 | 97.3 | 97.2 | 96.9 | 98.3 | 98.3 | 97.3 | 98.1 | 99.1 | 98.3 |      |      |      |      |      |      |      |
| 14 <i>Desmonostoc caucasicum</i> MZ-C154     | 96.4 | 96.7 | 95.9 | 95.9 | 95.9 | 96.4 | 97.5 | 96.5 | 95.3 | 96.3 | 97.0 | 97.6 | 97.1 |      |      |      |      |      |      |
| 15 <i>Desmonostoc salinum</i> CCM-UFV059     | 98.3 | 97.7 | 97.2 | 97.4 | 97.3 | 97.4 | 98.0 | 97.7 | 88.6 | 86.4 | 96.2 | 96.2 | 98.0 | 97.3 |      |      |      |      |      |
| 16 <i>Desmonostoc vinosum</i> HA7617-LM4     | 95.3 | 95.8 | 96.3 | 95.5 | 94.4 | 95.0 | 96.0 | 96.7 | 95.8 | 96.1 | 96.3 | 95.9 | 95.9 | 95.2 | 95.9 |      |      |      |      |
| 17 <i>Desmonostoc</i> sp. 111 CR4_BG11B      | 98.8 | 98.3 | 97.5 | 97.7 | 97.5 | 98.0 | 98.7 | 97.9 | 88.9 | 88.2 | 95.8 | 96.1 | 98.2 | 97.8 | 91.6 | 96.0 |      |      |      |
| 18 <i>Desmonostoc</i> sp. 7N clone_NC3C      | 97.6 | 97.3 | 99.5 | 96.9 | 96.9 | 96.2 | 97.8 | 99.7 | 84.7 | 96.7 | 95.2 | 94.8 | 97.7 | 96.6 | 86.6 | 96.6 | 88.5 |      |      |
| 19 <i>Desmonostoc</i> sp. 81-NMI_ANAB        | 97.7 | 97.5 | 99.7 | 97.1 | 97.1 | 96.4 | 97.9 | 99.9 | 84.8 | 96.8 | 95.4 | 95.0 | 97.9 | 96.8 | 86.7 | 96.6 | 88.6 | 99.8 |      |
| 20 <i>Desmonostoc</i> sp. CCIBT 3489         | 98.3 | 97.1 | 97.4 | 97.7 | 97.8 | 96.9 | 98.0 | 97.9 | 94.8 | 84.4 | 95.8 | 95.8 | 98.2 | 97.0 | 88.1 | 95.9 | 87.6 | 84.5 | 84.6 |

**Table S3.** Comparison of the 16S rRNA gene sequence similarity between *Desmonostoc* strains under investigation and species of other genera in Nostocaceae.

|                                               | 1    | 2    | 3    | 4    | 5    | 6    | 7    | 8    | 9    | 10   | 11   | 12   | 13   | 14   | 15   |
|-----------------------------------------------|------|------|------|------|------|------|------|------|------|------|------|------|------|------|------|
| 1 <i>Desmonostoc debaoense</i>                |      |      |      |      |      |      |      |      |      |      |      |      |      |      |      |
| 2 <i>Desmonostoc meilinense</i>               | 97.3 |      |      |      |      |      |      |      |      |      |      |      |      |      |      |
| 3 <i>Desmonostoc xianhuense</i>               | 97.9 | 97.5 |      |      |      |      |      |      |      |      |      |      |      |      |      |
| 4 <i>Desmonostoc</i> sp. CSM 013-B            | 97.8 | 97.2 | 97.0 |      |      |      |      |      |      |      |      |      |      |      |      |
| 5 <i>Desmonostoc aggregatum</i>               | 97.9 | 97.2 | 97.2 | 97.7 |      |      |      |      |      |      |      |      |      |      |      |
| 6 <i>Desmonostoc lechangense</i>              | 97.3 | 97.7 | 96.4 | 96.8 | 96.9 |      |      |      |      |      |      |      |      |      |      |
| 7 <i>Dendronalium phyllosphericum</i> CENA369 | 96.7 | 95.7 | 96.1 | 95.8 | 95.6 | 95.7 |      |      |      |      |      |      |      |      |      |
| 8 <i>Nostoc commune</i> EV1-KK1               | 94.8 | 94.8 | 95.4 | 95.2 | 94.8 | 94.7 | 95.3 |      |      |      |      |      |      |      |      |
| 9 <i>Nostoc punctiforme</i> PCC73102          | 94.7 | 94.1 | 94.5 | 94.8 | 94.4 | 93.8 | 95.4 | 99.1 |      |      |      |      |      |      |      |
| 10 <i>Mojavia pulchra</i> JT2-VF2             | 94.6 | 94.5 | 94.9 | 94.6 | 94.4 | 94.4 | 96.2 | 95.5 | 95.8 |      |      |      |      |      |      |
| 11 <i>Desikacharya soli</i> BHU2-PS           | 93.8 | 93.5 | 94.1 | 94.0 | 93.4 | 94.0 | 94.8 | 94.9 | 94.4 | 93.2 |      |      |      |      |      |
| 12 <i>Komarekiella atlantica</i> CCIBt 3483   | 94.7 | 94.5 | 95.3 | 94.8 | 94.3 | 94.9 | 96.5 | 95.7 | 94.8 | 96.6 | 82.9 |      |      |      |      |
| 13 <i>Aliinostoc morphoplasticum</i> NOS      | 93.4 | 93.0 | 93.3 | 93.3 | 92.5 | 93.9 | 94.3 | 93.1 | 93.0 | 93.7 | 88.3 | 85.2 |      |      |      |
| 14 <i>Nostoc minutum</i> NIES-26              | 96.3 | 95.7 | 95.9 | 95.9 | 96.0 | 95.7 | 98.3 | 96.0 | 95.9 | 96.0 | 95.0 | 95.9 | 94.8 |      |      |
| 15 <i>Violetonostoc minutum</i> CHAB5841      | 94.7 | 94.4 | 94.6 | 94.8 | 94.1 | 95.0 | 96.4 | 95.0 | 94.6 | 95.0 | 94.6 | 96.6 | 93.3 | 96.0 |      |
| 16 <i>Amazonocrinis nigriterrae</i> CENA18    | 95.1 | 95.1 | 95.3 | 95.7 | 95.1 | 95.1 | 97.2 | 95.7 | 95.7 | 96.1 | 83.7 | 89.0 | 84.6 | 97.5 | 95.9 |

**Table S4.** Comparison of the 16S rRNA gene sequence similarity between *Dendronalium* strains under investigation and closely related taxa.

|                                            | 1    | 2    | 3    | 4    | 5    | 6    | 7    | 8    | 9    | 10   | 11   | 12   | 13   | 14   | 15   | 16   | 17   | 18   |
|--------------------------------------------|------|------|------|------|------|------|------|------|------|------|------|------|------|------|------|------|------|------|
| 1 <i>Dendronalium</i> sp. CSM 003-B        |      |      |      |      |      |      |      |      |      |      |      |      |      |      |      |      |      |      |
| 2 <i>Dendronalium</i> sp. CSM 004-B1       | 99.0 |      |      |      |      |      |      |      |      |      |      |      |      |      |      |      |      |      |
| 3 <i>Dendronalium</i> sp. CSM 023-R        | 99.2 | 98.8 |      |      |      |      |      |      |      |      |      |      |      |      |      |      |      |      |
| 4 <i>Dendronalium</i> sp. CSM 024-R1       | 99.9 | 99.9 | 99.9 |      |      |      |      |      |      |      |      |      |      |      |      |      |      |      |
| 5 <i>Dendronalium</i> sp. CSM 025-N        | 99.1 | 98.7 | 99.6 | 99.8 |      |      |      |      |      |      |      |      |      |      |      |      |      |      |
| 6 <i>D. phyllosphericum</i> CENA369        | 99.0 | 98.8 | 98.9 | 99.6 | 98.7 |      |      |      |      |      |      |      |      |      |      |      |      |      |
| 7 <i>D. phyllosphericum</i> CENA73         | 98.6 | 98.4 | 98.6 | 99.2 | 98.3 | 99.1 |      |      |      |      |      |      |      |      |      |      |      |      |
| 8 <i>Dendronalium</i> sp. NP-KLS-5C-PS     | 99.0 | 98.7 | 99.2 | 99.4 | 98.9 | 99.5 | 99.2 |      |      |      |      |      |      |      |      |      |      |      |
| 9 <i>D. phyllosphericum</i> CENA389        | 98.0 | 98.0 | 97.9 | 98.8 | 97.8 | 98.4 | 98.7 | 98.2 |      |      |      |      |      |      |      |      |      |      |
| 10 <i>D. phyllosphericum</i> CENA358       | 99.1 | 98.8 | 99.0 | 99.7 | 98.8 | 99.8 | 99.2 | 99.6 | 98.5 |      |      |      |      |      |      |      |      |      |
| 11 <i>Nostoc minutum</i> NIES-26           | 97.6 | 97.4 | 97.5 | 98.3 | 97.4 | 98.3 | 98.5 | 98.4 | 97.9 | 98.4 |      |      |      |      |      |      |      |      |
| 12 <i>Nostoc commune</i> EV1-KK1           | 94.9 | 95.0 | 95.2 | 95.7 | 95.2 | 95.3 | 95.6 | 95.5 | 95.7 | 95.4 | 96.0 |      |      |      |      |      |      |      |
| 13 <i>Desmonostoc debaoense</i>            | 97.1 | 96.9 | 97.2 | 97.7 | 96.9 | 96.9 | 97.0 | 96.6 | 96.8 | 97.0 | 96.5 | 94.8 |      |      |      |      |      |      |
| 14 <i>Mojavia pulchra</i> JT2-VF2          | 96.2 | 96.2 | 96.4 | 96.8 | 96.4 | 96.2 | 96.7 | 96.4 | 96.5 | 96.3 | 96.0 | 95.5 | 94.9 |      |      |      |      |      |
| 15 <i>Desikacharya soli</i> BHU2-PS        | 93.9 | 93.8 | 93.8 | 94.6 | 93.6 | 94.8 | 94.8 | 83.8 | 95.0 | 94.8 | 95.1 | 95.0 | 94.4 | 93.2 |      |      |      |      |
| 16 <i>Komarekiella atlantica</i> CCIBt     | 96.0 | 96.0 | 96.0 | 97.1 | 95.9 | 96.5 | 97.0 | 80.4 | 96.2 | 96.5 | 95.9 | 95.7 | 95.5 | 96.6 | 85.4 |      |      |      |
| 17 <i>Aliinostoc morphoplasticum</i>       | 93.8 | 94.0 | 94.0 | 94.9 | 93.8 | 94.3 | 94.5 | 83.7 | 94.8 | 94.4 | 94.9 | 93.2 | 93.6 | 93.7 | 88.4 | 86.8 |      |      |
| 18 <i>Violetonostoc minutum</i>            | 95.6 | 95.7 | 95.5 | 96.4 | 95.4 | 96.4 | 96.5 | 96.9 | 96.2 | 96.5 | 95.8 | 95.0 | 94.7 | 94.9 | 94.7 | 96.6 | 94.1 |      |
| 20 <i>Amazonocrinis nigriterrae</i> CENA18 | 96.7 | 96.8 | 96.7 | 97.7 | 96.6 | 97.2 | 97.7 | 79.3 | 97.3 | 97.3 | 97.5 | 95.7 | 95.5 | 96.1 | 84.5 | 87.4 | 84.9 | 95.8 |

**Table S5.** Percent dissimilarity for the 16S-23S ITS region for *Dendronalium* strains.

|                                               | 1    | 2   | 3    | 4    | 5    |
|-----------------------------------------------|------|-----|------|------|------|
| 1 <i>Dendronalium</i> sp. CSM 003-B           |      |     |      |      |      |
| 2 <i>Dendronalium</i> sp. CSM 004-B           | 6.6  |     |      |      |      |
| 3 <i>Dendronalium</i> sp. CSM 023-R           | 1.0  | 6.9 |      |      |      |
| 4 <i>Dendronalium</i> sp. CSM 024-R           | 1.0  | 6.6 | 0.3  |      |      |
| 5 <i>Dendronalium</i> sp. CSM 025-N           | 1.4  | 6.6 | 0.2  | 0.2  |      |
| 5 <i>Dendronalium phyllosphericum</i> CENA369 | 10.6 | 4.3 | 10.6 | 10.6 | 10.6 |

**Table S6.** Analyses of the 16S-23S ITS region among *Desmonostoc* strains for which ITS sequences are complete. The strains under investigation are in bold font. Cyanobacterial taxa with ITS operon which does not contain tRNA genes are highlighted in yellow. The proposed three novel species are marked with an asterisk (\*) beside the name.

| Strains                                         | ITS Total length (nt) | Leader | D1-D1' Helix | Spacer + D2 | Spacer + D3 + Spacer | tRNAIle | Spacer + V2 Helix | tRNAAla | Post tRNA Spacer | Box-B Helix | Spacer + Box A | D4 + Spacer | V3 Helix | D5 (end region of ITS) | Accession No.                       |
|-------------------------------------------------|-----------------------|--------|--------------|-------------|----------------------|---------|-------------------|---------|------------------|-------------|----------------|-------------|----------|------------------------|-------------------------------------|
| <i>D. debaoense</i> CSM 005-N *                 | 530                   | 9      | 65           | 34          | 16                   | 74      | 93                | 73      | 36               | 29          | 28             | 21          | 31       | 21                     | OM746734/<br>OM746735               |
| <i>D. debaoense</i> CSM 005-N clone1/ clone2 *  | 276                   | 9      | 65           | 31          | 41                   | -       | -                 | -       | -                | 29          | 28             | 21          | 31       | 21                     | OR723793/<br>OR723794               |
| <i>D. meilinense</i> CSM 017-N/ CSM 018-N *     | 508                   | 9      | 65           | 33          | 14                   | 74      | 81                | 73      | 37               | 29          | 28             | 21          | 34       | 10                     | OM746739/<br>OM746738               |
| <i>D. meilinense</i> CSM 017-N clone1/clone2 *  | 258                   | 8      | 65           | 31          | 29                   | -       | -                 | -       | -                | 33          | 28             | 21          | 31       | 12                     | OR723795/<br>OR723796               |
| <i>D. xianhuense</i> CSM 008-B/009-B/010-B *    | 608/609               | 9      | 65           | 35          | 16                   | 74      | 79                | 73      | 38               | 54          | 28             | 25          | 90/91    | 22                     | OM746747/<br>OM746748/<br>OM746749  |
| <i>D. xianhuense</i> CSM 010-B clone1/clone2 *  | 335                   | 9      | 65           | 31          | 37                   | -       | -                 | -       | -                | 28          | 28             | 25          | 90       | 22                     | OR723797/<br>OR723798               |
| <i>Desmonostoc</i> sp. CSM 013-B                | 508                   | 9      | 65           | 33          | 15                   | 74      | 85                | 73      | 37               | 32          | 26             | 21          | 34       | 4                      | OM746744                            |
| <i>Desmonostoc</i> sp. CSM 013-B clone 1/clone2 | 254                   | 8      | 65           | 31          | 33                   | -       | -                 | -       | -                | 32          | 26             | 21          | 34       | 4                      | OR723799/<br>OR723800               |
| <i>D. aggregatum</i> CSM 019B/022B/021B         | 510                   | 9      | 65           | 33          | 14                   | 74      | 80                | 73      | 39               | 29          | 28             | 21          | 34       | 11                     | OM746742 /<br>OM746743/<br>OM746741 |
| <i>D. aggregatum</i> CSM 020-B/CF06             | 262                   | 9      | 65           | 31          | 34                   | -       | -                 | -       | -                | 29          | 28             | 21          | 34       | 11                     | OM746740/<br>MW263178               |

Table S6. Cont.

| Strains                                        | ITS Total length (nt) | Leader | D1-D1' Helix | Spacer + D2 | Spacer + D3 + Spacer | tRNAIle | Spacer + V2 Helix | tRNAAla | Post tRNA Spacer | Box-B Helix | Spacer + Box A | D4 + Spacer | V3 Helix | D5 (end region of ITS) | Accession No.         |
|------------------------------------------------|-----------------------|--------|--------------|-------------|----------------------|---------|-------------------|---------|------------------|-------------|----------------|-------------|----------|------------------------|-----------------------|
| <i>D. lechangense</i> CSM 014-B/ CF01          | 520                   | 9      | 65           | 33          | 14                   | 74      | 85                | 73      | 46               | 29          | 28             | 21          | 31       | 12                     | OM746737/<br>MW263177 |
| <i>D. lechangense</i> CSM 016-B                | 263                   | 9      | 65           | 31          | 36                   | -       | -                 | -       | -                | 29          | 29             | 21          | 31       | 12                     | OM746736              |
| <i>D. danxiaense</i> CHAB5868/CHAB5869         | 514                   | 7      | 65           | 33          | 16                   | 74      | 85                | 73      | 38               | 29          | 29             | 21          | 34       | 10                     | MH291268/<br>MH291269 |
| <i>D. alborizicum</i> 1387                     | 527                   | 9      | 69           | 32          | 15                   | 74      | 83                | 73      | 36               | 33          | 29             | 25          | 18       | 31                     | OM800960              |
| <i>D. salinum</i> CCM-UFV059                   | 275                   | 9      | 66           | 32          | 37                   | -       | -                 | -       | -                | 29          | 28             | 21          | 42       | 11                     | KX787933              |
| <i>D. caucasicum</i> MZ-C154                   | 571                   | 9      | 66           | 34          | 15                   | 74      | 82                | 71      | 40               | 28          | 28             | 25          | 76       | 23                     | OM044128              |
| <i>D. geniculatum</i> HA4340-LM1 clone37D      | 605                   | 9      | 65           | 35          | 16                   | 74      | 81                | 73      | 37               | 50          | 28             | 25          | 90       | 22                     | KU161662              |
| <i>D. geniculatum</i> HA4340-LM1 clone 37A/37C | 344                   | 9      | 65           | 31          | 46                   | -       | -                 | -       | -                | 28          | 28             | 25          | 90       | 22                     | KU161660/<br>KU161661 |
| <i>Desmonostoc</i> sp. CCIBT3489 clone53       | 525                   | 9      | 69           | 34          | 15                   | 74      | 83                | 73      | 36               | 29          | 29             | 25          | 18       | 31                     | KU161680              |
| <i>D. vinosum</i> HA7617-LM4                   | 577                   | 9      | 65           | 36          | 16                   | 74      | 94                | 73      | 16               | 40          | 29             | 27          | 34       | 64                     | KF417429              |
| <i>Desmonostoc</i> sp. 7N/NMI_ANAB             | 603                   | 9      | 65           | 35          | 16                   | 74      | 79                | 73      | 37               | 50          | 28             | 25          | 89       | 23                     | KF934182/<br>KF761562 |
| <i>Desmonostoc</i> sp. 111 CR4 BG11B/BG11N     | 274                   | 9      | 66           | 31          | 37                   | -       | -                 | -       | -                | 29          | 28             | 21          | 42       | 11                     |                       |
| <i>Desmonostoc</i> sp. CCSM-UFV020             | 526                   | 9      | 66           | 34          | 14                   | 74      | 85                | 73      | 40               | 29          | 28             | 21          | 42       | 11                     | MT708212              |

**Table S7.** Analyses of the 16S-23S ITS region among *Dendronalium* strains. The strains under investigation are in bold font.

| Strains                                  | ITS Total length (nt) | Leader | D1-D1' Helix | Spacer + D2 | Spacer + D3 + Spacer | tRNAIle | Spacer + V2 Helix | tRNAAla | Post tRNA Spacer | Box-B Helix | Spacer + Box A | D4 + Spacer | V3 Helix | D5 (end region of ITS) | Accession No.        |
|------------------------------------------|-----------------------|--------|--------------|-------------|----------------------|---------|-------------------|---------|------------------|-------------|----------------|-------------|----------|------------------------|----------------------|
| <i>Dendronalium</i> sp. <b>CSM 003-B</b> | 534                   | 8      | 64           | 34          | 14                   | 74      | 80                | 73      | 28               | 46          | 29             | 25          | 36       | 23                     | OM746754/OM746755    |
| <i>Dendronalium</i> sp. <b>CSM 004-B</b> | 540                   | 8      | 64           | 34          | 14                   | 74      | 86                | 73      | 28               | 46          | 29             | 25          | 36       | 23                     | OM746752/OM746753    |
| <i>Dendronalium</i> sp. <b>CSM 023-R</b> | 534                   | 8      | 64           | 34          | 14                   | 74      | 80                | 73      | 28               | 46          | 29             | 25          | 36       | 23                     | OM746750/OM746751    |
| <i>Dendronalium</i> sp. <b>CSM 024-R</b> | 534                   | 8      | 64           | 34          | 14                   | 74      | 80                | 73      | 28               | 46          | 29             | 25          | 36       | 23                     | OM746757             |
| <i>Dendronalium</i> sp. <b>CSM 025-N</b> | 534                   | 8      | 64           | 34          | 14                   | 74      | 80                | 73      | 28               | 46          | 29             | 25          | 36       | 23                     | OM746756             |
| <i>D. phyllosphericum</i> CENA369        | 540                   | 8      | 65           | 34          | 14                   | 74      | 86                | 73      | 28               | 35          | 29             | 25          | 36       | 23                     | NZ_JAECZA000000000.1 |
